# Supplementary material
Source: PubMed Central journal article supplement (PMC7132606)
Supplement: mmc1.pdf [file mmc1.pdf]

## **Supplemental Information**

### **First-in-Human, First-in-Child Trial of Autologous MSCs Carrying the Oncolytic Virus Icovir-5 in Patients with Advanced Tumors**

**David Ruano, José A. López-Martín, Lucas Moreno, Álvaro Lassaletta, Francisco Bautista, Maitane Andión, Carmen Hernández, África González-Murillo, Gustavo Melen, Ramón Alemany, Luis Madero, Javier García-Castro, and Manuel Ramírez**

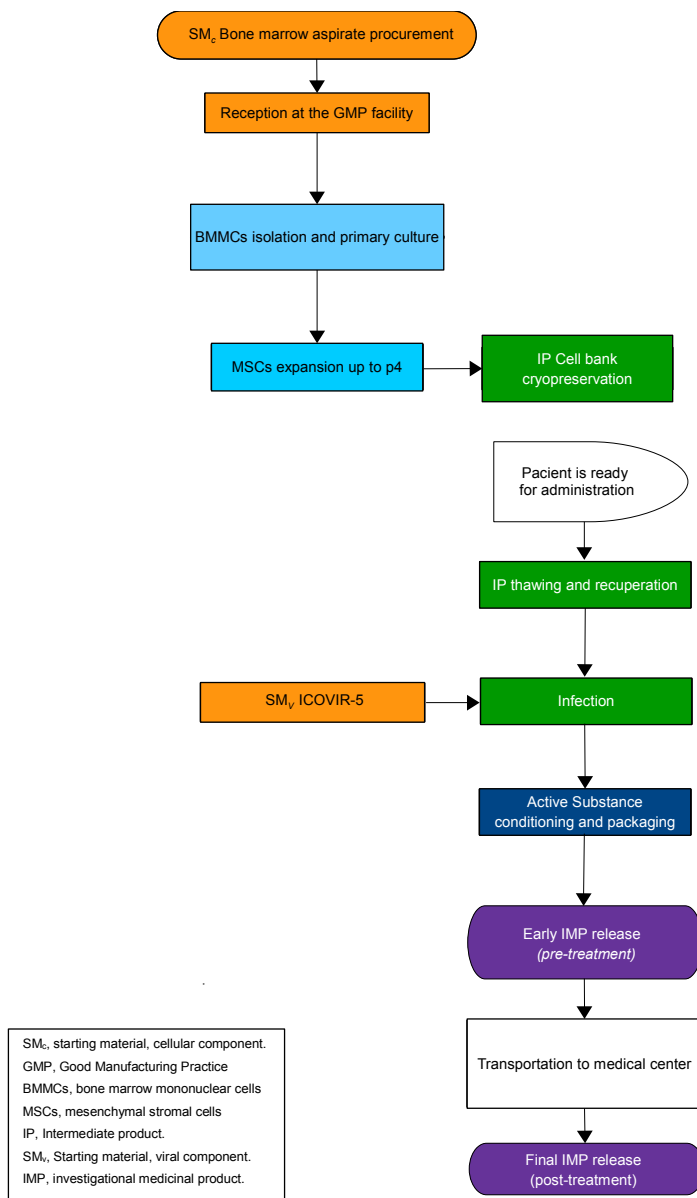

**Supplementary Figure.** Manufacturing process of Celyvir.

Supplementary Table I. Adverse effects related to therapy with Celyvir.

| Cohort        | Organs & Systems                                                                                                                                                                                                                                                                                                                                             | Symptoms                                | GRADE |      |   |      |   |      |   |   |   |      |  |  |
|---------------|--------------------------------------------------------------------------------------------------------------------------------------------------------------------------------------------------------------------------------------------------------------------------------------------------------------------------------------------------------------|-----------------------------------------|-------|------|---|------|---|------|---|---|---|------|--|--|
|               |                                                                                                                                                                                                                                                                                                                                                              |                                         | 1     |      | 2 |      | 3 |      | 4 |   |   |      |  |  |
|               |                                                                                                                                                                                                                                                                                                                                                              |                                         | n     | %    | n | %    | n | %    | n | % | n | %    |  |  |
| Cohort A      | Nervous system disorders<br>General disorders and administration site conditions<br>Musculoskeletal and connective tissue disorders                                                                                                                                                                                                                          | Headache                                | 1     | 12,5 | 0 | 0    | 0 | 0    | 0 | 0 | 0 | 0    |  |  |
|               |                                                                                                                                                                                                                                                                                                                                                              | Gait disturbances                       | 1     | 12,5 | 0 | 0    | 0 | 0    | 0 | 0 | 0 | 0    |  |  |
|               |                                                                                                                                                                                                                                                                                                                                                              | Pyrexia                                 | 3     | 37,5 | 0 | 0    | 0 | 0    | 0 | 0 | 0 | 0    |  |  |
|               |                                                                                                                                                                                                                                                                                                                                                              | Limb pain                               | 1     | 12,5 | 0 | 0    | 0 | 0    | 0 | 0 | 0 | 0    |  |  |
|               |                                                                                                                                                                                                                                                                                                                                                              | Bone pain                               | 1     | 12,5 | 0 | 0    | 0 | 0    | 0 | 0 | 0 | 0    |  |  |
|               |                                                                                                                                                                                                                                                                                                                                                              | Musculoskeletal chest pain              | 1     | 12,5 | 0 | 0    | 0 | 0    | 0 | 0 | 0 | 0    |  |  |
| Cohort B      | Analytical / biochemical explorations<br>Infections<br>Blood and lymphatic system disorders<br>Metabolism and nutrition disorders<br>Gastrointestinal disorders<br>General disorders and administration site conditions<br>Pain<br>Oedema<br>Pyrexia<br>Renal and urinary disorders<br>Respiratory, thoracic and mediastinal disorders<br>Vascular disorders | Increased blood alkaline phosphatase    | 0     | 0    | 1 | 12,5 | 0 | 0    | 0 | 0 | 0 | 0    |  |  |
|               |                                                                                                                                                                                                                                                                                                                                                              | Cellulitis                              | 1     | 12,5 | 0 | 0    | 0 | 0    | 0 | 0 | 0 | 0    |  |  |
|               |                                                                                                                                                                                                                                                                                                                                                              | Anemia                                  | 0     | 0    | 1 | 12,5 | 0 | 0    | 0 | 0 | 0 | 0    |  |  |
|               |                                                                                                                                                                                                                                                                                                                                                              | Anorexia                                | 0     | 0    | 1 | 12,5 | 0 | 0    | 0 | 0 | 0 | 0    |  |  |
|               |                                                                                                                                                                                                                                                                                                                                                              | Hypoalbuminemia                         | 0     | 0    | 1 | 12,5 | 0 | 0    | 0 | 0 | 0 | 0    |  |  |
|               |                                                                                                                                                                                                                                                                                                                                                              | Hypokalemia                             | 0     | 0    | 0 | 0    | 1 | 12,5 | 0 | 0 | 0 | 0    |  |  |
|               |                                                                                                                                                                                                                                                                                                                                                              | Diarrhea                                | 0     | 0    | 1 | 12,5 | 0 | 0    | 0 | 0 | 0 | 0    |  |  |
|               |                                                                                                                                                                                                                                                                                                                                                              | Abdominal distension                    | 1     | 12,5 | 0 | 0    | 0 | 0    | 0 | 0 | 0 | 0    |  |  |
|               |                                                                                                                                                                                                                                                                                                                                                              | Abdominal pain                          | 1     | 12,5 | 0 | 0    | 0 | 0    | 0 | 0 | 0 | 0    |  |  |
|               |                                                                                                                                                                                                                                                                                                                                                              | Nausea                                  | 2     | 25   | 0 | 0    | 0 | 0    | 0 | 0 | 0 | 0    |  |  |
|               |                                                                                                                                                                                                                                                                                                                                                              | Vomiting                                | 1     | 12,5 | 0 | 0    | 0 | 0    | 0 | 0 | 0 | 0    |  |  |
|               |                                                                                                                                                                                                                                                                                                                                                              | Asthenia                                | 1     | 12,5 | 0 | 0    | 0 | 0    | 0 | 0 | 0 | 0    |  |  |
|               |                                                                                                                                                                                                                                                                                                                                                              | General deterioration of physical state | 0     | 0    | 0 | 0    | 0 | 0    | 0 | 0 | 1 | 12,5 |  |  |
|               |                                                                                                                                                                                                                                                                                                                                                              | Pain                                    | 0     | 0    | 0 | 0    | 1 | 12,5 | 0 | 0 | 0 | 0    |  |  |
|               |                                                                                                                                                                                                                                                                                                                                                              | Oedema                                  | 0     | 0    | 1 | 12,5 | 0 | 0    | 0 | 0 | 0 | 0    |  |  |
|               |                                                                                                                                                                                                                                                                                                                                                              | Pyrexia                                 | 2     | 25   | 0 | 0    | 0 | 0    | 0 | 0 | 0 | 0    |  |  |
|               |                                                                                                                                                                                                                                                                                                                                                              | Anuria                                  | 1     | 12,5 | 0 | 0    | 0 | 0    | 0 | 0 | 0 | 0    |  |  |
| Dysuria       | 1                                                                                                                                                                                                                                                                                                                                                            | 12,5                                    | 0     | 0    | 0 | 0    | 0 | 0    | 0 | 0 |   |      |  |  |
| Renal failure | 0                                                                                                                                                                                                                                                                                                                                                            | 0                                       | 1     | 12,5 | 0 | 0    | 0 | 0    | 0 | 0 |   |      |  |  |
| Oliguria      | 1                                                                                                                                                                                                                                                                                                                                                            | 12,5                                    | 0     | 0    | 0 | 0    | 0 | 0    | 0 | 0 |   |      |  |  |
| Epistaxis     | 1                                                                                                                                                                                                                                                                                                                                                            | 12,5                                    | 0     | 0    | 0 | 0    | 0 | 0    | 0 | 0 |   |      |  |  |
| Hypotension   | 1                                                                                                                                                                                                                                                                                                                                                            | 12,5                                    | 0     | 0    | 0 | 0    | 0 | 0    | 0 | 0 |   |      |  |  |

In red, adverse effects recorded, not related to therapy. In black, adverse effects related to therapy.

**Supplementary Table II. Release criteria**

| Parameter                                  | Sample                | Method                          | Limits                           |
|--------------------------------------------|-----------------------|---------------------------------|----------------------------------|
| <b>Early release (pre-treatment)</b>       |                       |                                 |                                  |
| <b>Primary container</b>                   |                       |                                 |                                  |
| Integrity                                  | 100 ml-sterile bottle | Visual inspection               | Complies                         |
| Label                                      |                       |                                 | Readable                         |
| <b>Content</b>                             |                       |                                 |                                  |
| Aspect                                     | Cell suspension       | Visual inspection               | w/o cell aggregates              |
| Volume                                     | Cell suspension       | Visual inspection               | 50 ml                            |
| Cell count <sup>1</sup>                    | Cells                 | Manual cell count               | 0,5-1,0x10 <sup>6</sup> cells/kg |
| Cumulative PD <sup>1,2</sup>               |                       |                                 | ≤10                              |
| Viability <sup>1</sup>                     | Cells                 | Trypan blue exclusion           | ≥75%                             |
| Endotoxinas <sup>2</sup>                   | Cell suspension       | LAL<br>(Ph. Eur. 2.6.14)        | ≤1,0 EU/ml                       |
| <b>Immunophenotype<sup>1</sup></b>         |                       |                                 |                                  |
| CD90(+)                                    | Cells                 | FACS                            | ≥85%                             |
| CD73(+)                                    |                       |                                 | ≥85%                             |
| CD29(+)                                    |                       |                                 | ≥85%                             |
| CD14(+)                                    |                       |                                 | <5%                              |
| CD19(+)                                    |                       |                                 | <5%                              |
| CD45(+)                                    |                       |                                 | <5%                              |
| <b>Final release (post-treatment)</b>      |                       |                                 |                                  |
| Sterility                                  | Cell suspension       | BD BACTEC™<br>(Ph. Eur. 2.6.27) | No growth                        |
| Mycoplasma <sup>1</sup>                    | Supernatant           | RT-PCR<br>(Ph. Eur. 2.6.7)      | Negative                         |
| Cytopathic effect <sup>1,3</sup>           | Cells                 | Internal procedure              | ≥90%                             |
| Adenovirus quantification <sup>1,2,4</sup> | Supernatant           | qRT-PCR                         | ≥3,5 log                         |

<sup>1</sup>Controls performed on active substance before conditioning and packaging. <sup>2</sup>To be implemented throughout next phase of development. <sup>3</sup>To be replaced by Adenovirus quantification. Cells are seeded following infection and cultured under

permissive conditions during 7 days. Cell confluence is evaluated under optic microscope, confluence percentage is calculated and registered. <sup>4</sup>Cells are seeded following infection and cultured under permissive conditions during 7 days. Supernatant is assessed for adenovirus quantification with a clinical grade-qRT-PCR diagnostic kit.
